# Supplementary material
Source: publisher figshare collection journal article supplement (https://asha.figshare.com/articles/dataset/_/26053033)
Supplement: Supplementary file 1 [file 1]

**Supplemental Material S3.** Sequence of *Story Champs* intervention sessions.

| Sessions | Intervention Target                | Examples                 |
|----------|------------------------------------|--------------------------|
| 1–3      | Story grammar                      | Character, plot, setting |
| 4–5      | Causal connections                 | Because, so that         |
| 6–7      | Temporal connections               | When, after              |
| 8–9      | Modifiers                          | <i>Big</i> ball          |
| 10–12    | Review of all intervention targets |                          |
