# Supplementary material
Source: publisher figshare collection journal article supplement (https://asha.figshare.com/articles/dataset/_/26053033)
Supplement: Supplementary file 2 [file 1]

**Supplemental Material S2.** Parent demographics.

| Participant | Race    | Ethnicity       | Mother's Education              |
|-------------|---------|-----------------|---------------------------------|
| Ice         | White   | Hispanic/Latino | High school with diploma or GED |
| Bruno       | Unknown | Hispanic/Latino | Some college but no degree      |
| Coco        | White   | Hispanic/Latino | Bachelor's degree               |
| Batman      | NR      | NR              | NR                              |

*Note.* Parent demographics as provided by parent reporting; NR= No response.
