# Supplementary material
Source: publisher figshare collection journal article supplement (https://asha.figshare.com/articles/dataset/_/26053033)
Supplement: Supplementary file 3 [file 1]

**Supplemental Material S1.** Percent Spanish heard spoken in the home.

| Participant | Age (years) |      |      |     |      |      |     |     |     |
|-------------|-------------|------|------|-----|------|------|-----|-----|-----|
|             | 0–1         | 1–2  | 2–3  | 3–4 | 4–5  | 5–6  | 6–7 | 7–8 | 8–9 |
| Ice         | 50%         | 50%  | 75%  | 75% | 100% | 100% | 50% | 50% | 50% |
| Bruno       | 100%        | 100% | 25%  | 25% | 25%  | 50%  | 50% | 75% | NA  |
| Coco        | 100%        | 100% | 100% | 50% | 50%  | 75%  | 75% | 75% | NA  |
| Batman      | NR          | NR   | NR   | NR  | NR   | NR   | NR  | NR  | NR  |

*Note.* This table shows the percentage of time each participant heard Spanish spoken in the home as provided by parent reporting. The age range of 8–9 years was not applicable for four of the Spanish–English bilingual participants. One participant did not provide a response (Batman).
